# Supplementary material
Source: Research Square preprint supplement (doi:10.21203/rs.3.rs-9709478/v1)
Supplement: Supplementary file 1 [file 300721932378a4d528b74a4d.docx]

Supplementary references

Campos H, Steffen W, Agüero G, Parra O, Zúñiga L (1983) Limnological studies in Lake Villarrica. Morphometry, physics, chemistry and primary productivity. Arch. Hydrobiol., (Suppl.) 71: 37-67.

Campos H, Steffen W, Agüero G, Parra O, Zúñiga L (1989) Limnological study of Lake Llanquihue (Chile): morphometry, physics, chemistry and primary productivity. Arch. Hydrobiol., (Suppl.) 81: 37-67

Campos H, Steffen W, Agüero G, Parra O, Zúñiga L (1989) Estudios limnológicos en el lago Puyehue (Chile): morfometría, factores físicos y químicos, plancton y productividad primaria. Med. Amb., 10: 36-53.

Campos H, Steffen W, Agüero G, Parra O, Zúñiga L (1990) Limnological study of Lake Todos los Santos (Chile): morphometry, physics, chemistry and primary productivity. Arch. Hydrobiol., (Suppl.), 117: 453-484.

Campos H, Steffen W, Agüero G, Parra O, Zúñiga L (1992a) Limnological study of Lake Ranco (Chile). Limnológica, 22: 337-353.

Campos H, Steffen W, Agüero G, Parra O, Zúñiga L (1992b) Limnological studies of Lake Rupanco (Chile): morphometry, physics, chemistry and primary productivity. Arch. Hydrobiol., (Suppl.), 90: 85-113.

De los Ríos P, Rogers DC, Rivera N (2008) Branchinecta gaini Daday, 1910 (Branchiopoda, Anostraca) as a bioindicator of oligotrophic and low conductivity shallow ponds in southern Chilean Patagonia. Crustaceana, 81: 1025-1034.https://doi.org/10.1163/156854008X360789

De los Ríos Escalante P (2011) A null model to study community structure of microcrustacean assemblages in northern Chilean shallow lakes. Crustaceana, 84: 513-521. https://doi.org/10.1163/001121611X579169

De los Ríos-Escalante P, Hauenstein E, Romero-Mieres M (2011) Microcrustacean assemblages composition and environmental variables in lakes and ponds of the Andean region-South of Chile (37-39 S). Brazilian J. Biol., 71: 353-358. https://doi.org/10.1590/S1519-69842011000300003

De los Ríos P, Roa G (2010) Species assemblages of zooplanktonic crustaceans in mountain shallow ponds of Chile (Parque Cañi). Zoologia (Curitiba), 27: 81-86. https://doi.org/10.1590/S1984-46702010000100012

De los Ríos-Escalante P, Hauenstein E, Acevedo P, Romero-Miéres M, Pandourski I (2012a). Regulatory factors in crustacean zooplankton assemblages in mountain lakes of northern Chilean Patagonia (38-41°S): a comparison with Bulgarian counterparts (42°N). Latin American J. Aq. Res., 40: 473-479. http://dx.doi.org/10.3856/vol40-issue2-fulltext-24

De los Rios-Escalante, P., Hauenstein, E., Romero-Mieres, M., & Acevedo, P (2012b) Use of null models to explain crustacean zooplankton assemblages in waterbodies of Alerce Andino National Park (41 S, Chile). Crustaceana, 85: 713-722. https://doi.org/10.1163/156854012X643933

De los Ríos-Escalante P, Kies F, 2017. Crustacean zooplankton in Chiloé Island coastal lakes (42°S, Chile). Crustaceana, 91: 213-223. https://doi.org/10.1163/15685403-00003766

Schmid-Araya JM, Zuñiga LR (1992) Zooplankton community structure in two Chilean reservoirs. Arch. Hydrobiol., 123: 305-335.

Soto D, De los Rios P (2006) Influence of trophic status and conductivity on zooplankton composition in lakes and ponds of Torres del Paine National Park (Chile). Biologia, Bratislava, 61: 541-546. https://doi.org/10.2478/s11756-006-0088-7

Villalobos L (1999) Determinación de capacidad de carga y balance de fósforo y nitrógeno de los lagos Riesco, Los Palos, y Laguna Escondida en la XI región. (Technical Report Fisheries Research Foundation-Chile, FIP-IT/97-39.).

Wölfl S (1996) Untersuchungen zur Zooplanktonstruktur einschliesslich der mikrobiellen Gruppen unter besonderer Berücksichtigung der mixotrophen Ciliaten in zwei südchilenischen Andenfußseen: 1-242. (Doctoral Thesis, University of Konstanz)
